# Supplementary material for: A Retro‐biosynthesis‐Based Route to Generate Pinene‐Derived Polyesters
Source: PubMed Central journal article supplement — Chembiochem. 2019 May 21;20(13):1664–71. doi: 10.1002/cbic.201900046 (PMC6618282; doi:10.1002/cbic.201900046), 2019-05-21
Supplement: CBIC-20-1664-s001.pdf [file CBIC-20-1664-s001.pdf]

# CHEMBIOCHEM

## Supporting Information

### **A Retro-biosynthesis-Based Route to Generate Pinene-Derived Polyesters**

Arne Stamm<sup>+, [a, b]</sup> Antonino Biundo<sup>+, [a, b]</sup> Björn Schmidt,<sup>[a, b]</sup> Jörg Brücher,<sup>[e]</sup>  
Stefan Lundmark,<sup>[f]</sup> Peter Olsén,<sup>[a]</sup> Linda Fogelström,<sup>[a, d]</sup> Eva Malmström,<sup>[a, d]</sup>  
Uwe T. Bornscheuer,<sup>[g]</sup> and Per-Olof Syrén<sup>\*[a, b, c, d]</sup>

cbic\_201900046\_sm\_miscellaneous\_information.pdf

## Table of contents

|                                                                 |     |
|-----------------------------------------------------------------|-----|
| Sequences                                                       | S2  |
| Primers for construction of the F246A variant                   | S3  |
| Figure S1. SDS-PAGE analysis                                    | S3  |
| Figure S2. GC-spectra of the “normal lactone” <b>10</b>         | S4  |
| Figure S3. <sup>1</sup> H-NMR spectra from enzymatic upscaling  | S4  |
| Figure S4. <sup>1</sup> H-NMR spectra                           | S5  |
| Figure S5. <sup>1</sup> H-NMR spectra                           | S5  |
| Figure S6. High-resolution GC/MS-ToF mass spectrum              | S6  |
| Figure S7. HSQC correlation plot                                | S7  |
| Figure S8. H,H-COSY                                             | S8  |
| Figure S9. Molecular weight distributions                       | S9  |
| Figure S10. <sup>1</sup> H-NMR spectra of precipitated polymers | S9  |
| Supplementary references                                        | S10 |

## Sequences of CHMO<sub>Acineto\_QM</sub>

The gene and protein sequences of CHMO<sub>Acineto\_QM</sub> are given below:

5'-

```
atgggcagcagccatcatcatcatcacagcagcggcctggtgccgcggcagccatattggctagcatgactg
gtggacagcaaatgggtcgcggatccatgtcacaaaaatggatttgatgctatcgtgattggtggtggtttggcggg
ctttatgcagtcaaaaaattaagagacgagctcgaacttaaggtcaggcttttgataaagccacggatgtcgcaggta
cttggtactggaaccgftaccaggtgacgtgacggatacagaaacccacctctactgctattcttgggataaagaatta
ctacaatcgctagaaatcaagaaaaaatatgtgcaaggccctgatgtacgcaagtattacagcaagtggtgaaaa
gcatgattaaagaagagctatcaattcaataccgcggtcaatcggctcattacaacgaagcagatgccttggggaa
gtcaccactgaatatggtgataagtacagggcgcggttcctcatcactgctttaggcttattgtctgcgcctaactgcca
acatcaaaggcattaatcagtttaagggtgagctgcatcataccagccgctggccagatgacgtaagtttgaaggta
aacgtgtcggcgtgattggtacgggtccaccggtgttcaggttattacggctgtggcacctctggctaaacacctcactg
tctccagcgttctgcacaatacagcgttccaattggcaatgatccactgtctgaagaagatgtaaaaagatcaaaga
caattatgacaaaattgggatggtgatggaattcagcccttgccttggcctgaatgaaagcacagtgccagcaatg
agcgtatcagctgaagaacgcaaggcagttttgaaaaggcatggcaaacaggtggcgggttccgttcatgttgaaa
ctttcggatgattgccaccaatattggaagccaatattcgaagcgaataattcattaagggtaaaattgctgaaatcgtc
aaagatccagccattgcacagaagcttatgccacaggatttgatgcaaaacgtccgttgtgtgacagtggttactaca
acaccttaaccgtgacaatgtccgtttagaagatgtgaaagccaatccgattgttgaattaccgaaaacgggtgtgaa
actcgaaaatggcgttccgttgaattagacatgctgatactggccacaggtttgatgccgtcgatggcaactatgtgcg
catggacattcaaggtaaaaacggcctggccattaaagactactggaaagaaggccgctcgagctatatgggtgtctg
cgtaataactatccaaacatgttcatggtgcttggaccgaatggcccgtttaccaacctgccgcatcaattgaatcac
aggtggaatggatcagtgataccattcaatacaggttgaaaacaatgttgaatccattgaatgcacaaaagaagcg
gaagaacaatggactcaaactgcccgaatattgcggaaatgacctattccctaaagcgaatcctggatgtttggtgc
gaatatcccgggcaagaaaaacacggttacttctatctcgggtggtttaaaagaatatcgcagtgcgctagccaactgc
aaaaacctgacctatgaagggtttgatattcaattacaacggtcagatatcaagcaacctgccaatgcctaa-3'
```

Translated sequence of CHMO<sub>Acineto\_QM</sub>:

```
MGSSHHHHHSSGLVPRGSHMASMTGGQQMGRGSMQKMDFDAIVIGGGFGGL
YAVKKLRDELELVQAFDKATDVAGTWYWNRYPGALTDTEHLYCYSWDKELLQS
LEIKKKYVQGPVDRKYLQQVAEKHDLKKSQYQFNTAVQSAHYNEADALWEVTTEYG
DKYTARFLITALGLLSAPNLPNIKGINQFKGELHHTSRWPDDVSFEGKRVGVIGTGST
GVQVITAVAPLAKHLTVFQRSAQYSVPIGNDPLSEEDVKKIKDNYDKIWDGVWNSAL
AFGLNESTVPAMSVSAEERKAVFEKAWQTGGGFRFMFETFGDIATNMEANIEAQN
IKGKIAEIVKDPAIAQKLMQDLYAKRPLCDSGYNTFNDRDNVRLDVKANPIVEITEN
GVKLENGDFVELDMLILATGFDAVDGNYVRMDIQGKNGLAIKDYWKEGPSSYMGV
CVNNYPNMFVLPNGPFTNLPPSIESQVEWISDTIQYTVENNVESIECTKEAEEQ
WTQTCANIAEMTLFPKAQSWIFGANIPGKKNVYFYLGGLKEYRSALANCKNHAYE
GFDIQLQRSDIKQPANA
```

For reference, the original protein sequence of wild type CHMO<sub>Acineto</sub> (GenBank: BAA86293.1<sup>[1]</sup>), is given below:

```
MSQKMDFDAIVIGGGFGGLYAVKKLRDELELVQAFDKATDVAGTWYWNRYPGAL
TDTEHLYCYSWDKELLQSLEIKKKYVQGPVDRKYLQQVAEKHDLKKSQYQFNTAVQ
SAHYNEADALWEVTTEYGDKYTARFLITALGLLSAPNLPNIKGINQFKGELHHTSRW
PDDVSFEGKRVGVIGTGSTGVQVITAVAPLAKHLTVFQRSAQYSVPIGNDPLSEEDV
```

KKIKDNYDKIWDGVVNSALAFGLNESTVPAMSVSAEERKAVFEKAWQTGGGFRFM  
 FETFGDIATNMEANIEAQNFIKGKIAEIVKDPAIAQKLMQDLYAKRPLCDSGYNTF  
 NRDNVRLLEDVKANPIVEITENGVKLENGDFVELDMLICATGFDAVDGNYVRMDIQGK  
 NGLAMKDYWKEGPSSYMGVTVNNYPNMFMLGPNPFTNLPPSIESQVEWISDTI  
 QYTVENNVESIEATKEAEEQWTQTCANIAEMTLFPAQSWIFGANIPGKKNNTVYFYL  
 GGLKEYRSALANCKNHAYEGFDIQLQRSDIKQPANA

### Construction of the F246A variant

Primers in the 5' to 3' direction are specified below:

F246A\_f

ggtgatggaattcagcccttgccGCGggcctgaatg

F246A\_r

ggcactgtgctttcattcaggccGCGggcaagg

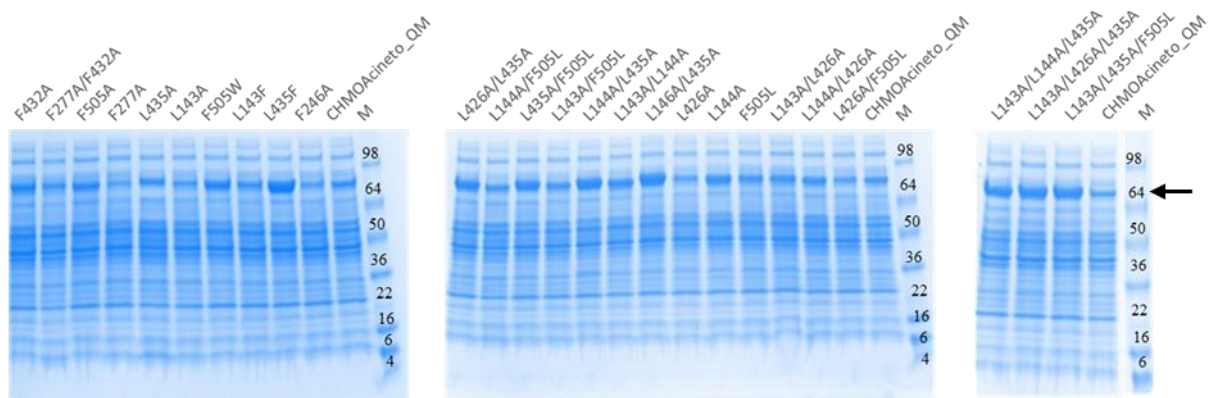

**Figure S1.** SDS-PAGE analysis (4-15%) of CHMO<sub>Acineto\_QM</sub> and its variants expressed in *E. coli* BL21(DE3). Samples were taken after 20 h of induction (with 0.05 mM IPTG) at 25°C. Lane M, pre-stained protein molecular ladder SeeBlue Plus 2. Relevant bands of CHMO<sub>Acineto\_QM</sub> and variants are indicated by the arrow.

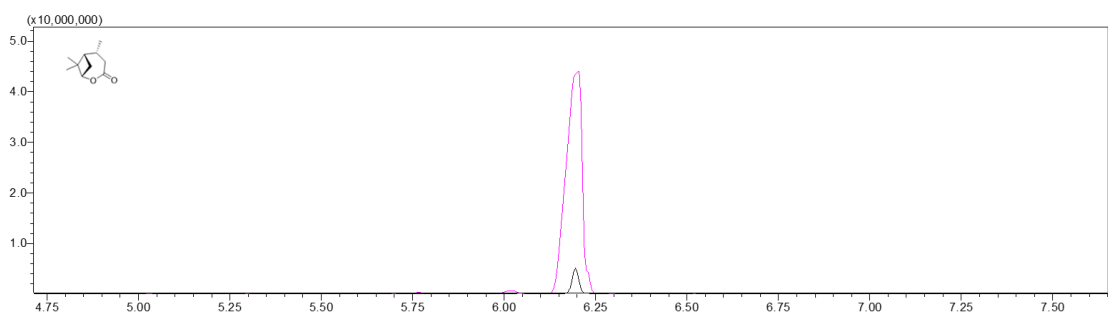

**Figure S2.** GC-spectra of the “normal lactone” **10** chemically (*purple*) and enzymatically (*black*) produced.

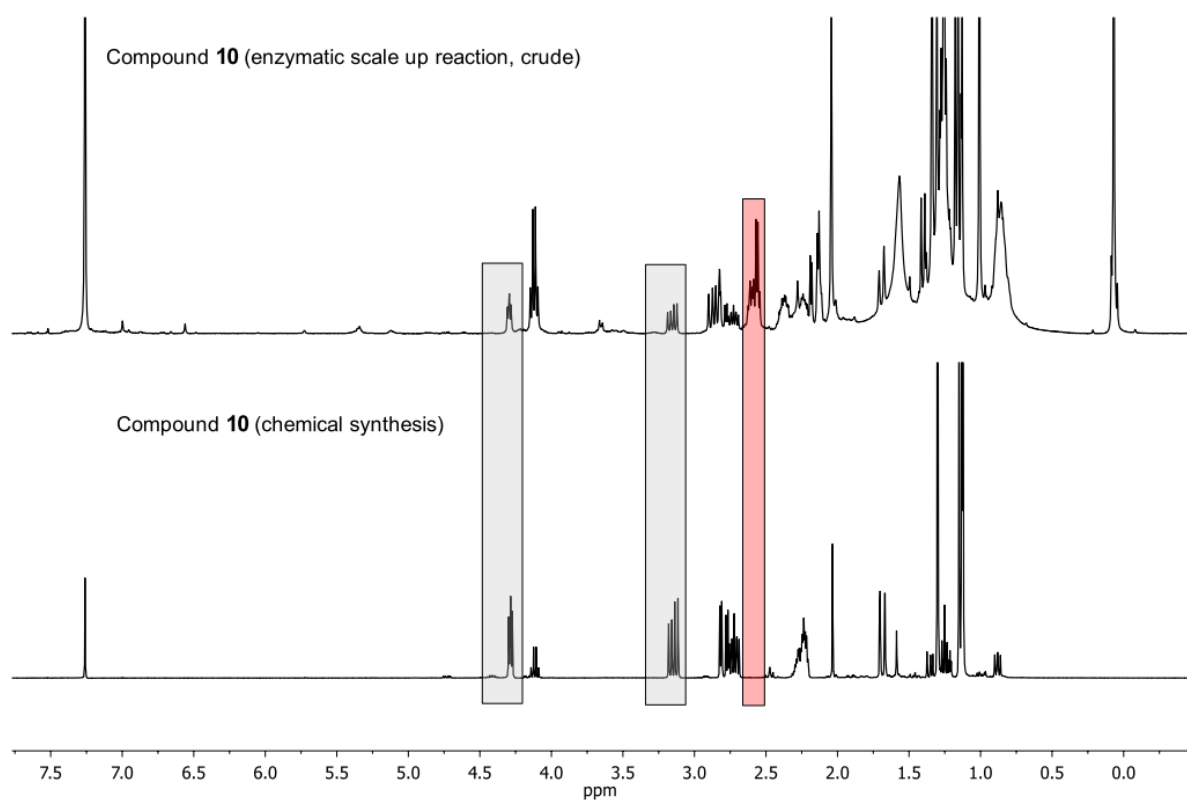

**Figure S3.**  $^1\text{H-NMR}$  spectra of extracted reaction mixture from enzymatic upscaling (top) compared to  $^1\text{H-NMR}$  of compound **10** (bottom). Rectangles used to highlight the characteristic peaks of compound **10** (grey) and **9** (red).

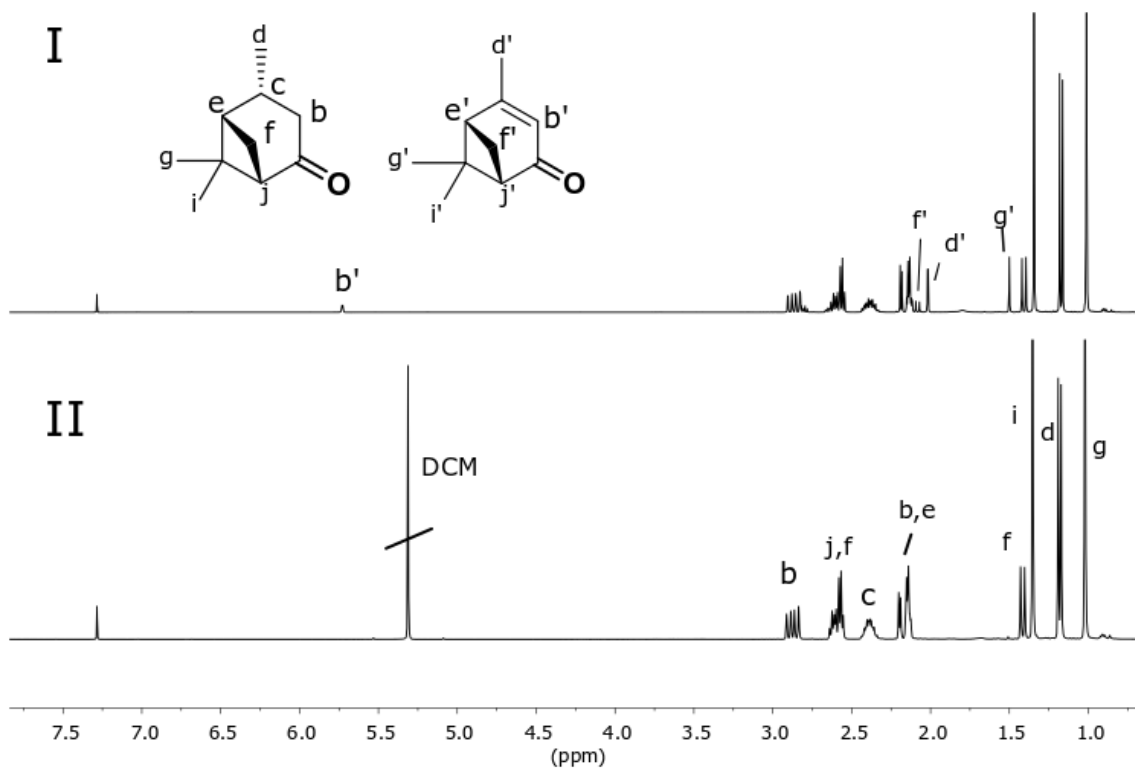

**Figure S4.**  $^1\text{H-NMR}$  spectra of (I.) a mixture containing both **8** and **9** and (II.) the chemically reduced mixture of (I.) in order to contain only **9**.

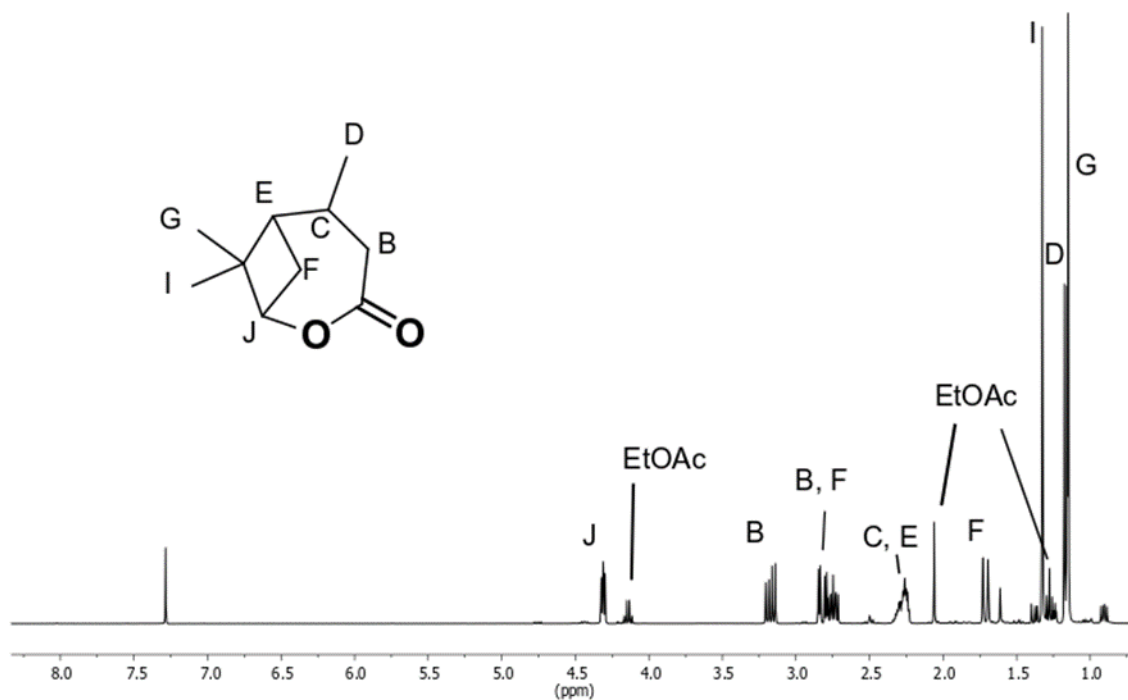

**Figure S5**  $^1\text{H-NMR}$  spectra of **10**.

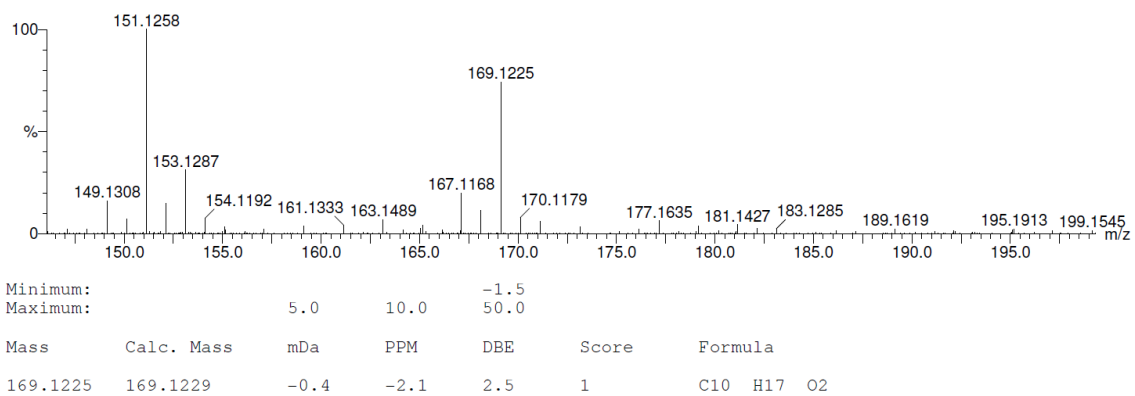

**Figure S6.** High-resolution GC/MS-ToF mass spectrum of **10**. Spectra was acquired with chemical ionization and methane as a reagent gas.

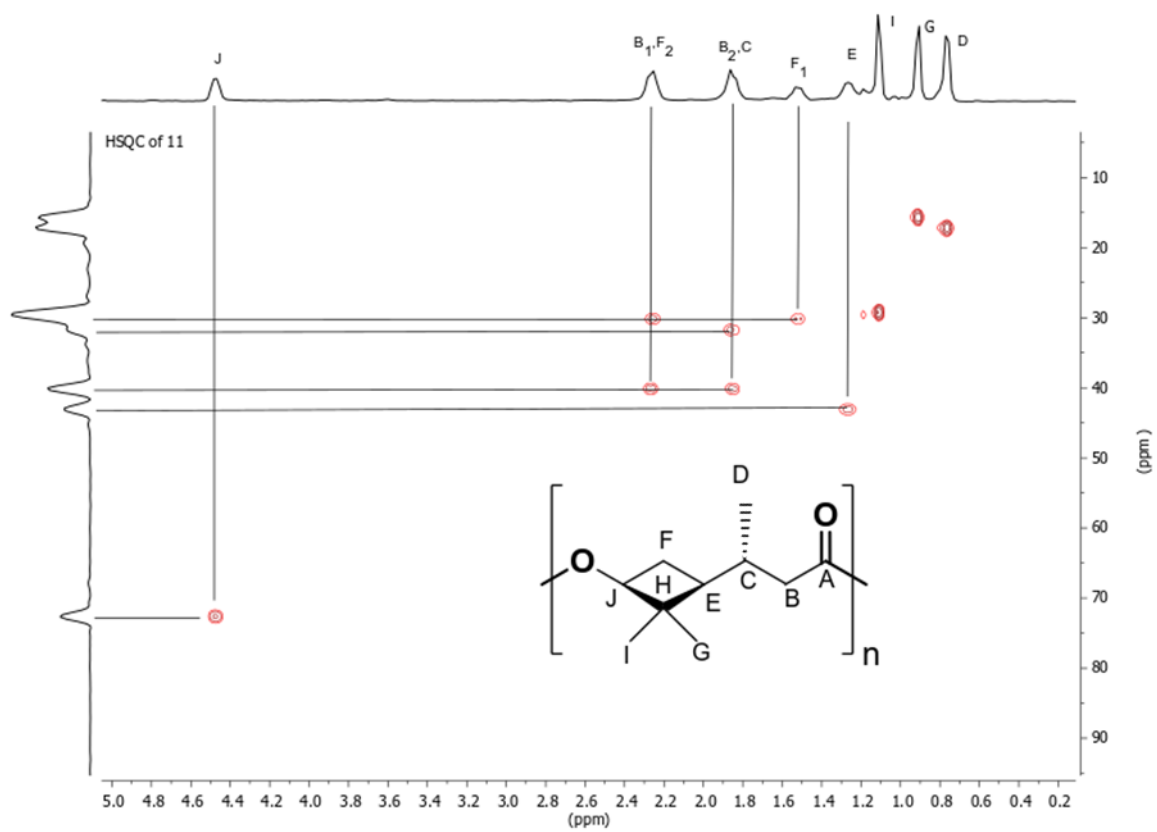

**Figure S7.** HSQC correlation plot of **11** polymerized using MSA/benzyl alcohol for 24 h at 70 °C.



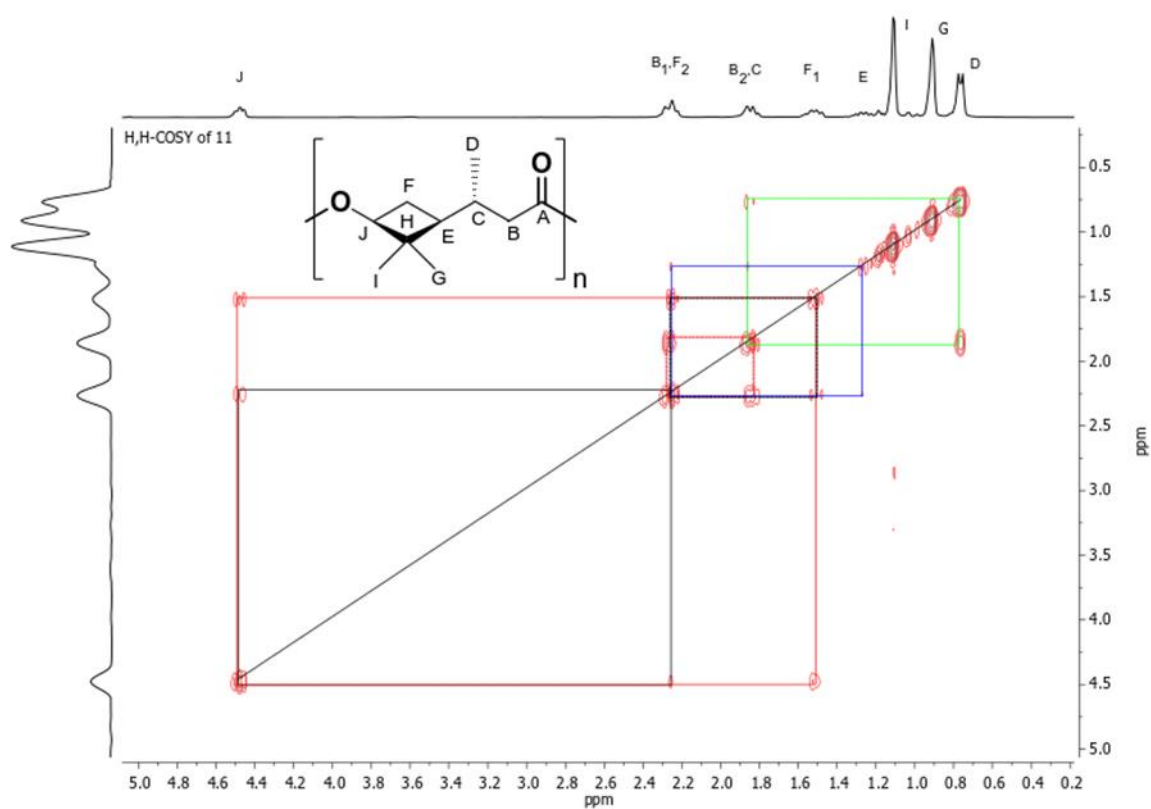

**Figure S8.** H,H-COSY of **11** polymerized with MSA/benzyl alcohol for 24 h at 70 °C. Rectangles indicate the coupling between the specific protons. Large black: J-F<sub>2</sub> coupling, large red: J-F<sub>1</sub> coupling, small black: F<sub>1</sub>-F<sub>2</sub> coupling, small red: B<sub>1</sub>-B<sub>2</sub> coupling, blue: E-F<sub>2</sub> coupling and green: C-D coupling.

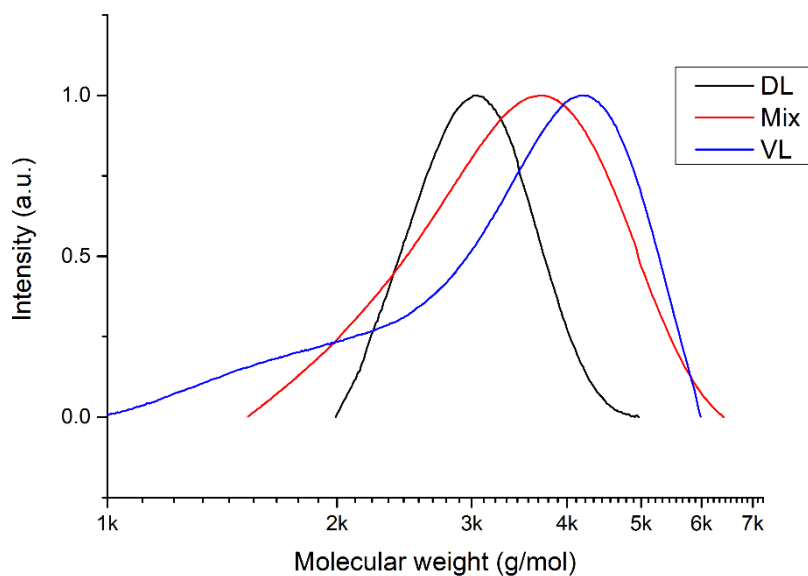

**Figure S9.** Molecular weight distributions for the synthesized polyesters. Black: poly- $\epsilon$ DL; Red: poly( $\epsilon$ DL- $\epsilon$ VaL); Blue: poly- $\epsilon$ VaL.

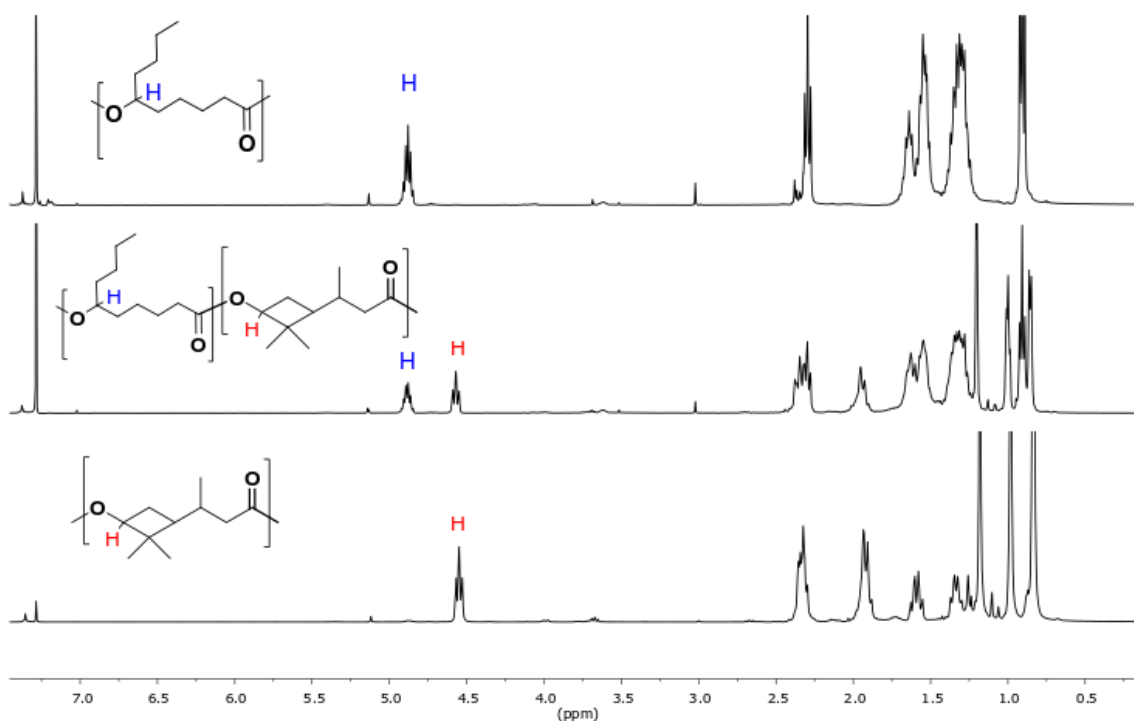

**Figure S10.**  $^1\text{H-NMR}$  spectra of precipitated polymers (top: poly- $\epsilon$ DL; middle: poly( $\epsilon$ DL- $\epsilon$ VaL); bottom: poly- $\epsilon$ VaL) polymerized using MSA/benzyl alcohol for 24 h at 70  $^\circ\text{C}$ .

## Supplementary References

- [1] Y. C. Chen, O. P. Peoples, C. T. Walsh, *J. Bacteriol.* **1988**, *170*, 781-789.
